# Supplementary material
Source: PubMed Central journal article supplement (PMC7964342)
Supplement: 2517_table.pdf [file 2517_table.pdf]

**On-line Table: Infratentorial neuroimaging findings in 75 patients with JSRD**

| Cerebellar and Brain Stem Neuroimaging Findings |                        | Patients with JSRD (n = 71) <sup>a</sup> | Patients with OFD VI (n = 4) |
|-------------------------------------------------|------------------------|------------------------------------------|------------------------------|
| PF                                              |                        |                                          |                              |
| Size                                            | Enlarged               | 32 (45%)                                 | 4 (100%)                     |
| Retrocerebellar fluid                           | Present                | 14 (20%)                                 | 3 (75%)                      |
|                                                 | Marked                 | 2 (3%)                                   | 0 (0%)                       |
| Prepontine cistern                              | Enlarged               | 9 (13%)                                  | 2 (50%)                      |
| Foramen magnum cephalocele                      |                        | 5 (7%)                                   | 1 (25%)                      |
| Cerebellar hemispheres                          |                        |                                          |                              |
| Size                                            | Reduced                | 12 (17%)                                 | 3 (75%)                      |
|                                                 | Enlarged               | 5 (7%)                                   | 0 (0%)                       |
| Morphology                                      | Folial disorganization | 25 (35%)                                 | 3 (75%)                      |
| Interhemispheric cleft                          | Slit                   | 53 (75%)                                 | 1 (25%)                      |
|                                                 | 1–2 mm                 | 0 (0%)                                   | 3 (75%)                      |
|                                                 | >2 mm                  | 13 (18%)                                 | 0 (0%)                       |
|                                                 | Inverted Y             | 5 (8%)                                   | 0 (0%)                       |
| SCP <sup>b</sup>                                |                        |                                          |                              |
| Width                                           | Minimally thickened    | 6 (9%)                                   | 0 (0%)                       |
|                                                 | Obviously thickened    | 65 (91%)                                 | 4 (100%)                     |
| Length                                          | Very elongated         | 3 (4%)                                   | 0 (0%)                       |
| Orientation                                     | Parallel               | 62 (87%)                                 | 3 (75%)                      |
|                                                 | A-like                 | 4 (6%)                                   | 1 (25%)                      |
|                                                 | V-like                 | 2 (3%)                                   | 0 (0%)                       |
|                                                 | Curved                 | 3 (4%)                                   | 0 (0%)                       |
| Pontomesencephalic isthmus <sup>b</sup>         |                        |                                          |                              |
| IF                                              | Minimally deep         | 16 (22%)                                 | 0 (0%)                       |
|                                                 | Obviously deep         | 55 (78%)                                 | 4 (100%)                     |
| Cerebral peduncles <sup>b</sup>                 |                        |                                          |                              |
| Tooth crown                                     | Asymmetric             | 10 (14%)                                 | 2 (50%)                      |
| Mesencephalon                                   |                        |                                          |                              |
| Morphology                                      | Dysmorphic             | 8 (11%)                                  | 3 (75%)                      |
| Length                                          | Shortened              | 2 (3%)                                   | 0 (0%)                       |
|                                                 | Elongated              | 4 (6%)                                   | 2 (50%)                      |
| Width                                           | Thin                   | 5 (8%)                                   | 1 (25%)                      |
|                                                 | Thickened              | 6 (9%)                                   | 2 (50%)                      |
| Interpeduncular heterotopia                     |                        | 3 (4%)                                   | 0 (0%)                       |
| Tectum                                          | Dysmorphic             | 19 (27%)                                 | 3 (75%)                      |
| Pons                                            |                        |                                          |                              |
| Morphology                                      | Dysmorphic             | 1 (1%)                                   | 0 (0%)                       |
| Width                                           | Reduced                | 5 (8%)                                   | 3 (75%)                      |
|                                                 | Enlarged               | 4 (6%)                                   | 0 (0%)                       |
| Medulla                                         |                        |                                          |                              |
| Morphology                                      | Dysmorphic             | 4 (6%)                                   | 1 (25%)                      |
| Width                                           | Reduced                | 0 (0%)                                   | 0 (0%)                       |
|                                                 | Enlarged               | 3 (4%)                                   | 1 (25%)                      |
| Posterior protuberance                          |                        | 2 (3%)                                   | 1 (25%)                      |

<sup>a</sup>The 4 patients with OFD VI are compared with the other patients as another group.

<sup>b</sup>Structures building the MTS.
